# Supplementary material for: Constructing a pyrene-based dimer in a crystal by adjusting the steric hindrance over the pyrene plane
Source: Royal Society of Chemistry journal article supplement (doi:10.1039/d3ce00744h), 2023-01-01
Supplement: d3ce00744h1.pdf [file d3ce00744h1.pdf]

## Supporting Information

### **Constructing pyrene-based dimer in a crystal by adjusting steric hindrance over the pyrene plane**

Zhou-An Xia,<sup>a‡</sup> Xiangyu Zhang,<sup>a‡</sup> Chang Xi,<sup>a</sup> Qing Bai,<sup>b</sup> Haichao Liu,<sup>\*a</sup> Shi-Tong Zhang,<sup>a</sup> and Bing Yang<sup>\*a</sup>

<sup>a</sup> State Key Laboratory of Supramolecular Structure and Materials, College of Chemistry, Jilin University, Changchun, 130012, P. R. China

<sup>b</sup> College of New Materials and New Energies, Shenzhen Technology University, Shenzhen, 518118, P. R. China

Corresponding author e-mails: [hcliu@jlu.edu.cn](mailto:hcliu@jlu.edu.cn); [yangbing@jlu.edu.cn](mailto:yangbing@jlu.edu.cn)

<sup>‡</sup> These authors contributed equally.

## SI Experimental details

**SI-1 General information:** All the reagents and solvents used for the synthesis were purchased from Aldrich and Acros companies and used without further purification.  $^1\text{H}$  and  $^{13}\text{C}$  NMR spectra were recorded on a Bruker AVANCE 500 spectrometer, using tetramethylsilane (TMS) as the internal standard. The mass spectra were recorded using a Thermo Fisher ITQ1100 instrument. Elementar vario MICRO cube Elemental Analyzer was used to perform the elemental analysis.

**SI-2 Single crystal X-ray diffraction (SCXRD) data:** The crystals of **Py-*o*BZT**, **Py-*m*BZT**, and **Py-*p*BZT** were obtained through solvent diffusion method in a system of tetrahydrofuran and methanol. The diffraction experiments were carried out on a Rigaku R-Axis RAPID diffractometer equipped with a Mo-K $\alpha$  ( $\lambda = 0.71073 \text{ \AA}$ ) and control Software using the RAPID AUTO at room temperature. The crystal structures were solved with direct methods and refined with a full-matrix least-squares technique using the Olex2 programs. The non-hydrogen atoms were refined with anisotropic thermal parameters. Hydrogen atoms were set as riding on the parent atoms after placing them in idealized positions around respective parent atoms. Drawings of molecular conformations and molecular stacking structures were made using Mercury software.

**SI-3 Photophysical measurements:** UV-vis spectra of solutions were recorded on a Shimadzu UV-3100 Spectrophotometer. Emission spectra and time-resolved emission spectra were carried out on a FLS980 Spectrofluorometer. Photoluminescence quantum yields (PLQYs) were measured using an integrating sphere apparatus on a FLS980 Spectrofluorometer.

**SI-4 Theoretical calculation:** All the density functional theory (DFT) calculations were carried out using Gaussian 09 (version D.01) package on a PowerLeader cluster.<sup>[1]</sup> The optimization of ground state geometries of single molecules was carried out at the level of B3LYP /6-31G(d, p). The time-dependent density functional theory (TD-DFT) was carried out for the excited state geometry optimization at the level of M06-2X/6-31G(d, p), and the vertical excitation energies was calculated at the level of M06-2X/6-31G(d, p). Electrostatic potential (ESP) maps were obtained using an Multiwfn software and a VMD software.<sup>[2]</sup> Visualization analysis of weak interactions was made using an Multiwfn software and a VMD software. Interaction energy was calculated using a Multiwfn software based on AMBER forcefield, and the geometries used were directly taken out from the crystal structures. Two-dimensional potential energy surface (PES) was simulated using

Gaussian 09 (version D.01) package combined with the Multiwfn software and Molclus software.<sup>[3]</sup> Specifically, the dimer structures with constant  $\pi$ - $\pi$  distance (3.5 Å) and different  $\pi$ - $\pi$  overlap (step length is 0.1 Å) were constructed through the coordinate transformation function of Multiwfn software, and the  $\pi$ - $\pi$  distance of 3.5 Å was used on basis of the analysis of the actual geometry of the pyrene dimer in crystal packing structures. The xyz2QC subroutine of Molclus software was used to construct the input documents for Gaussian calculation.

## SII Synthetic details

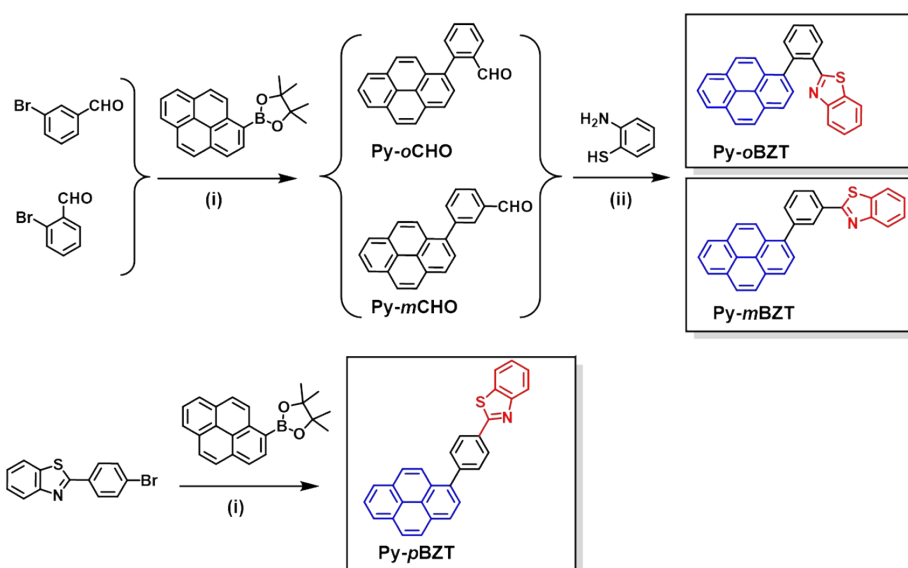

**Scheme S1.** Synthetic routes to **Py-oBZT**, **Py-mBZT**, and **Py-pBZT** compounds. (i)  $K_2CO_3$ ,  $Pd(PPh_3)_4$ ,  $H_2O$ , toluene,  $90\text{ }^\circ\text{C}$  for 48 h in nitrogen ( $N_2$ ) atmosphere; (ii) DMSO,  $170\text{ }^\circ\text{C}$  for 12 h.

### Synthesis of 2-(2-(pyren-1-yl)phenyl)benzo[d]thiazole (**Py-oBZT**)

A mixture of 4,4,5,5-tetramethyl-2-(pyren-1-yl)-1,3,2-dioxaborolane (820 mg, 2.50 mmol), 2-bromobenzaldehyde (460 mg, 2.50 mmol),  $K_2CO_3$  (3.46 g, 25.00 mmol), distilled water (15 mL), and toluene (30 mL) was degassed and recharged with nitrogen. Then  $Pd(PPh_3)_4$  (92 mg, 0.08 mmol) was added in the mixture as catalyst and the mixture was degassed and recharged with nitrogen again. After stirred and heated under reflux at  $90\text{ }^\circ\text{C}$  for 48 h, the cooled reaction mixture was extracted with dichloromethane. The organic phase was filtered and concentrated in a vacuum. It was purified via silica gel chromatography by petroleum ether and dichloromethane to afford pale yellow solid **Py-oCHO** in 53% yield (405 mg).  $^1H$  NMR (500 MHz,  $DMSO-d_6$ , TMS,  $25\text{ }^\circ\text{C}$ ):  $\delta$ = 9.59 (s, 1H), 8.41 (dd,  $J = 17.6, 7.7$  Hz, 2H), 8.33 (d,  $J = 7.6$  Hz, 1H), 8.30 (s, 2H), 8.21 – 8.04 (m, 4H), 7.92 (td,  $J = 7.5, 1.4$  Hz, 1H), 7.78 (t,  $J = 7.6$  Hz, 1H), 7.68 (dd,  $J = 17.1, 8.3$  Hz, 2H).

A mixture of **Py-oCHO** (397 mg, 1.30 mmol) and 2-aminobenzenethiol (195 mg, 1.56 mmol) in DMSO (20 mL) was stirred under nitrogen atmosphere for 12 h at  $170\text{ }^\circ\text{C}$ . The reaction was then stopped, most of the DMSO was evaporated under reduced pressure, and the crude was purified via silica gel chromatography by petroleum ether and dichloromethane to afford the yellow powder **Py-**

**oBZT** in 63% yield (337 mg). <sup>1</sup>H NMR (500 MHz, DMSO-*d*<sub>6</sub>, TMS, 25 °C): δ= 8.49 – 8.43 (m, 1H), 8.40 (d, *J* = 7.8 Hz, 1H), 8.36 (d, *J* = 7.0 Hz, 1H), 8.30 (d, *J* = 9.3 Hz, 2H), 8.25 (d, *J* = 7.3 Hz, 1H), 8.09 (dt, *J* = 11.8, 8.0 Hz, 2H), 8.04 (d, *J* = 7.8 Hz, 1H), 7.94 (d, *J* = 8.1 Hz, 1H), 7.80 – 7.75 (m, 2H), 7.70 (d, *J* = 9.2 Hz, 1H), 7.63 – 7.57 (m, 2H), 7.41 – 7.35 (m, 1H), 7.21 – 7.15 (m, 1H). <sup>13</sup>C NMR (126 MHz, CDCl<sub>3</sub>, TMS, 25°C): δ= 167.20, 151.58, 140.30, 136.15, 135.04, 133.51, 132.33 (CH), 131.54, 131.38, 130.96, 130.25 (CH), 130.08 (CH), 128.48 (CH), 128.40 (CH), 128.12 (CH), 127.93 (CH), 127.51 (CH), 126.17 (CH), 125.95 (CH), 125.41 (CH), 125.35 (CH), 124.82 (CH), 122.81 (CH), 121.23 (CH). GC/MS, EI (mass *m/z*): 411.84 [M<sup>+</sup>] (calcd: 411.52). Anal. Calcd for C<sub>29</sub>H<sub>17</sub>NS: C, 84.64; H, 4.16; N, 3.40; S, 7.79. Found: C, 85.24; H, 4.16; N, 3.40; S, 8.08.

### Synthesis of 2-(3-(pyren-1-yl)phenyl)benzo[*d*]thiazole (Py-*m*BZT)

A mixture of 4,4,5,5-tetramethyl-2-(pyren-1-yl)-1,3,2-dioxaborolane (820 mg, 2.50 mmol), 3-bromobenzaldehyde (460 mg, 2.50 mmol), K<sub>2</sub>CO<sub>3</sub> (3.46 g, 25.00 mmol), distilled water (15 mL), and toluene (30 mL) was degassed and recharged with nitrogen. Then Pd(PPh<sub>3</sub>)<sub>4</sub> (92 mg, 0.08 mmol) was added in the mixture as catalyst and the mixture was degassed and recharged with nitrogen again. After stirred and heated under reflux at 90 °C for 48 h, the cooled reaction mixture was extracted with dichloromethane. The organic phase was filtered and concentrated in a vacuum. It was purified via silica gel chromatography by petroleum ether and dichloromethane to afford white solid **Py-*m*CHO** in 83% yield (643 mg). <sup>1</sup>H NMR (500 MHz, DMSO-*d*<sub>6</sub>, TMS, 25 °C): δ= 10.19 (s, 1H), 8.43 (d, *J* = 7.8 Hz, 1H), 8.37 (d, *J* = 7.6 Hz, 1H), 8.33 (d, *J* = 7.6 Hz, 1H), 8.28 (s, 2H), 8.22 (d, *J* = 9.2 Hz, 1H), 8.18 (d, *J* = 1.9 Hz, 1H), 8.12 – 8.07 (m, 4H), 8.01 (d, *J* = 7.5 Hz, 1H), 7.87 (t, *J* = 7.6 Hz, 1H).

A mixture of **Py-*m*CHO** (635 mg, 2.07 mmol) and 2-aminobenzenethiol (310 mg, 2.48 mmol) in DMSO (25 mL) was stirred under nitrogen atmosphere for 12 h at 170 °C. The reaction was then stopped, most of the DMSO was evaporated under reduced pressure, and the crude was purified via silica gel chromatography by petroleum ether and dichloromethane to afford the brownish yellow powder **Py-*m*BZT** in 77% yield (655 mg). <sup>1</sup>H NMR (400 MHz, DMSO-*d*<sub>6</sub>, TMS, 25°C): δ= 8.46 (d, *J* = 7.8 Hz, 1H), 8.39 (d, *J* = 7.6 Hz, 1H), 8.35 (t, *J* = 3.8 Hz, 2H), 8.31 – 8.09 (m, 9H), 7.91 – 7.83 (m, 2H), 7.59 (t, *J* = 7.6 Hz, 1H), 7.51 (t, *J* = 7.6 Hz, 1H). <sup>13</sup>C NMR (126 MHz, CDCl<sub>3</sub>, TMS, 25 °C): δ=168.02, 153.94, 142.24, 136.55, 135.03, 133.76, 133.27 (CH), 131.50, 130.96, 129.63

(CH), 129.12 (CH), 128.58, 127.87 (CH), 127.68 (CH), 127.58 (CH), 127.43 (CH), 126.49 (CH), 126.13 (CH), 125.38 (CH), 125.32 (CH), 125.04 (CH), 124.94 (CH), 124.88, 124.72 (CH), 123.28 (CH), 121.69 (CH). GC/MS, EI (mass m/z): 411.00 [ $M^+$ ] (calcd: 411.52). Anal. Calcd for  $C_{29}H_{17}NS$ : C, 84.64; H, 4.16; N, 3.40; S, 7.79. Found: C, 85.03; H, 4.13; N, 3.48; S, 7.94.

### **2-(4-(pyren-1-yl)phenyl)benzo[*d*]thiazole (Py-*p*BZT)**

A mixture of 4,4,5,5-tetramethyl-2-(pyren-1-yl)-1,3,2-dioxaborolane (820 mg, 2.50 mmol), 2-(4-bromophenyl)benzo[*d*]thiazole (727 mg, 2.50 mmol),  $K_2CO_3$  (3.46 g, 25.00 mmol), distilled water (15 mL), and toluene (30 mL) was degassed and recharged with nitrogen. Then  $Pd(PPh_3)_4$  (92 mg, 0.08 mmol) was added in the mixture as catalyst and the mixture was degassed and recharged with nitrogen again. After stirred and heated under reflux at 90 °C for 48 h, the cooled reaction mixture was extracted with dichloromethane. The organic phase was filtered and concentrated in a vacuum. It was purified via silica gel chromatography by petroleum ether and dichloromethane to afford white solid **Py-*p*BZT** in 83% yield (855 mg).  $^1H$  NMR (500 MHz,  $DMSO-d_6$ , TMS, 25 °C):  $\delta$ = 8.43 (d,  $J$  = 7.8 Hz, 1H), 8.36 (q,  $J$  = 8.0 Hz, 4H), 8.28 (s, 2H), 8.26 – 8.18 (m, 3H), 8.14 (t,  $J$  = 7.9 Hz, 3H), 7.88 (d,  $J$  = 8.1 Hz, 2H), 7.61 (t,  $J$  = 7.7 Hz, 1H), 7.53 (t,  $J$  = 7.6 Hz, 1H).  $^{13}C$  NMR (126 MHz,  $CDCl_3$ , TMS, 25°C):  $\delta$ = 167.92, 153.94, 144.24, 136.52, 134.99, 132.34, 131.49, 131.32 (CH), 131.00, 128.46, 127.89 (CH), 127.76 (CH), 127.70 (CH), 127.40 (CH), 126.54 (CH), 126.16 (CH), 125.38 (CH), 125.07 (CH), 124.92 (CH), 124.75 (CH), 123.23 (CH), 121.72 (CH). GC/MS, EI (mass m/z): 411.11 [ $M^+$ ] (calcd: 411.52). Anal. Calcd for  $C_{29}H_{17}NS$ : C, 84.64; H, 4.16; N, 3.40; S, 7.79. Found: C, 85.12; H, 4.16; N, 3.44; S, 7.97.

### SIII Figures and tables

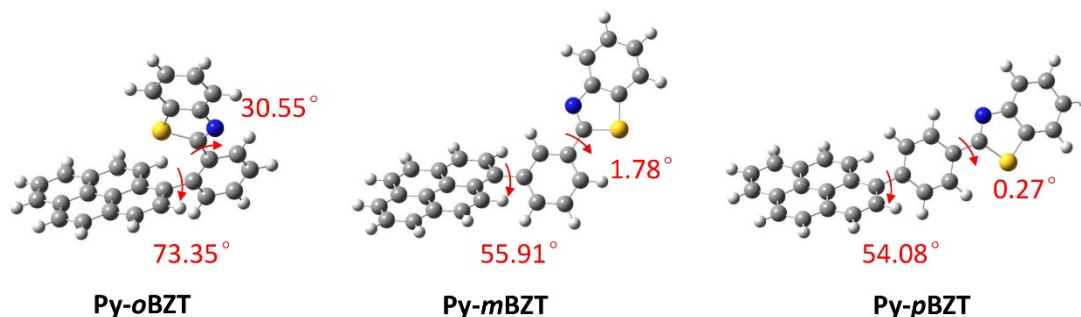

Figure S1. Optimized ground state geometries of Py-*o*BZT, Py-*m*BZT, and Py-*p*BZT.

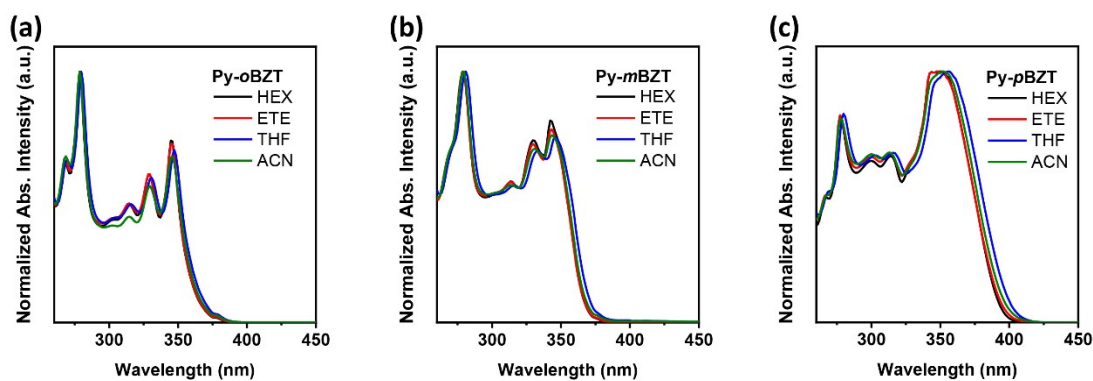

Figure S2. Absorption spectra of (a) Py-*o*BZT, (b) Py-*m*BZT, and (c) Py-*p*BZT diluted in solvents with different polarities. Concentration is controlled to be 10  $\mu$ M. HEX is hexane, ETE is ethyl ether, THF is tetrahydrofuran, and ACN is acetonitrile.

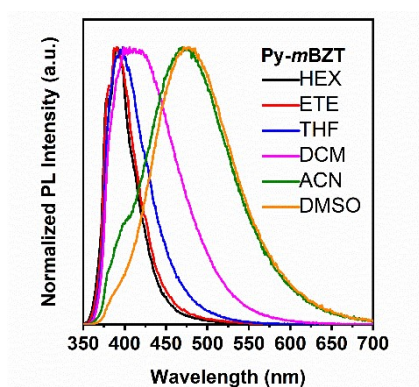

Figure S3. Emission spectra of Py-*m*BZT diluted in solvents with different polarities. Concentration is controlled to be 10  $\mu$ M. HEX is hexane, ETE is ethyl ether, THF is tetrahydrofuran, DCM is dichloromethane, ACN is acetonitrile, and DMSO is dimethyl sulfoxide.

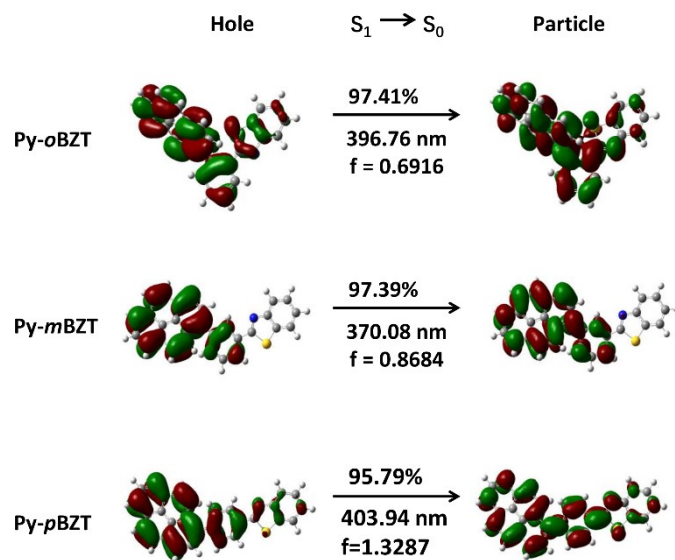

**Figure S4.** NTOs of  $S_1$  state of Py-*o*BZT, Py-*m*BZT, and Py-*p*BZT.

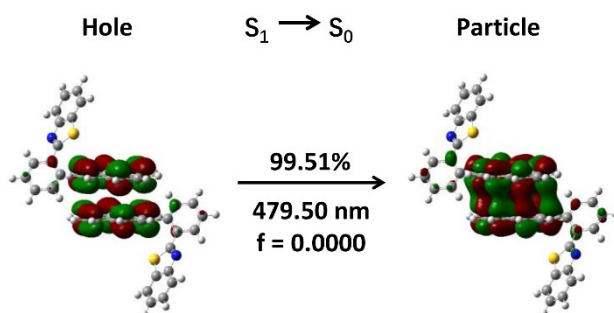

**Figure S5.** NTOs of  $S_1$  state of the pyrene-based dimer for Py-*o*BZT.



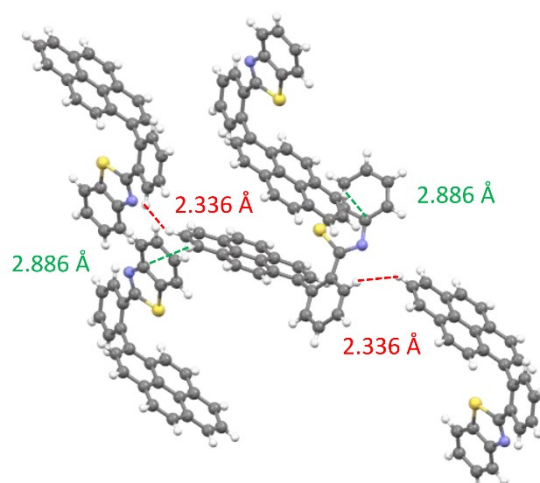

**Figure S6.** Intermolecular interactions in the **Py-*o*BZT** crystal.

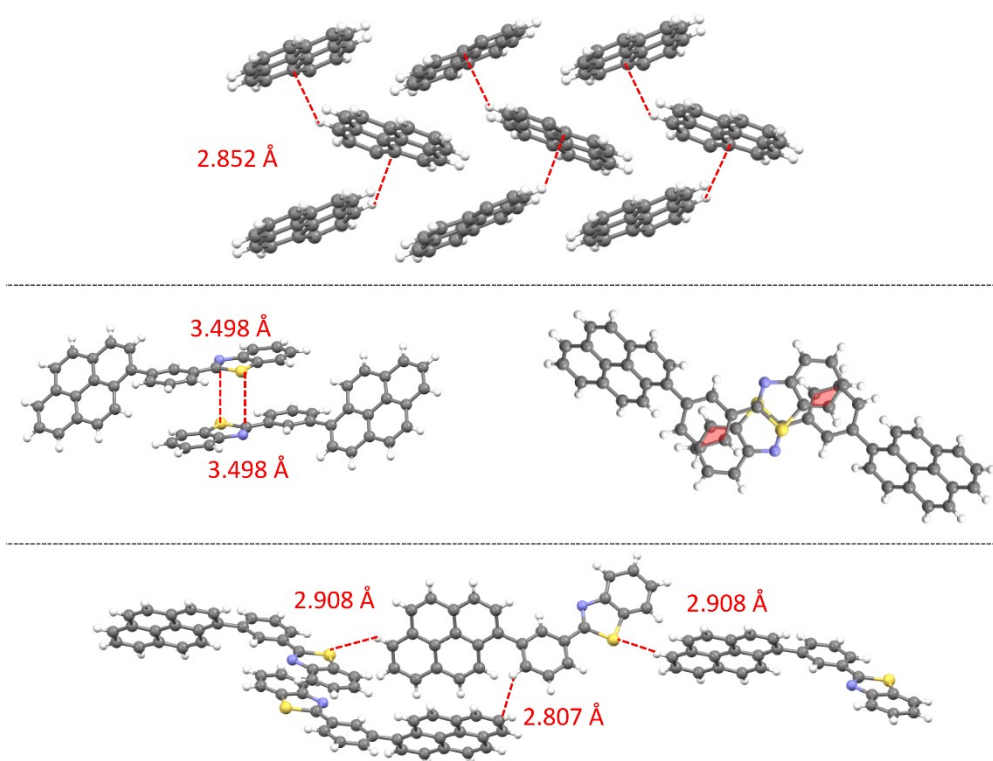

**Figure S7.** Intermolecular interactions in the **Py-*m*BZT** crystal.

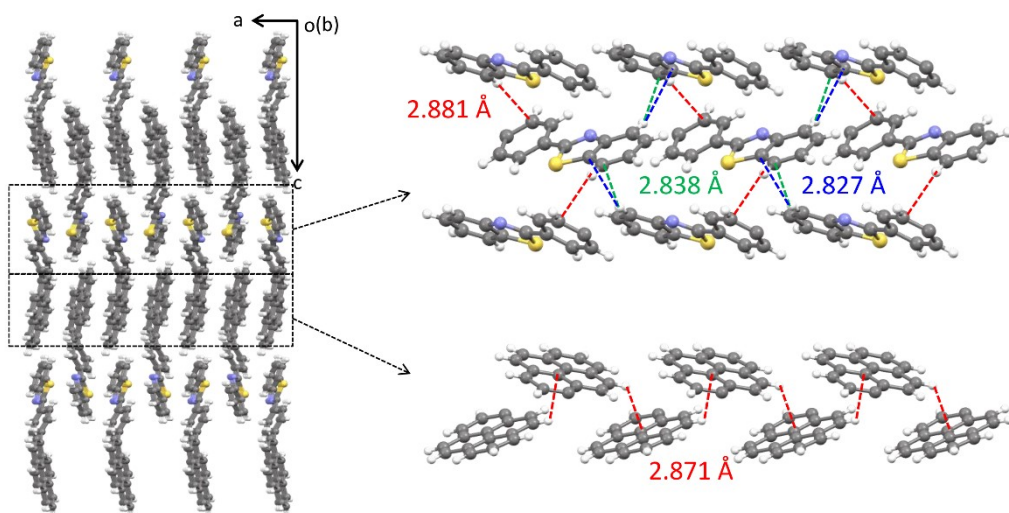

**Figure S8.** Intermolecular interactions in the **Py-pBZT** crystal.

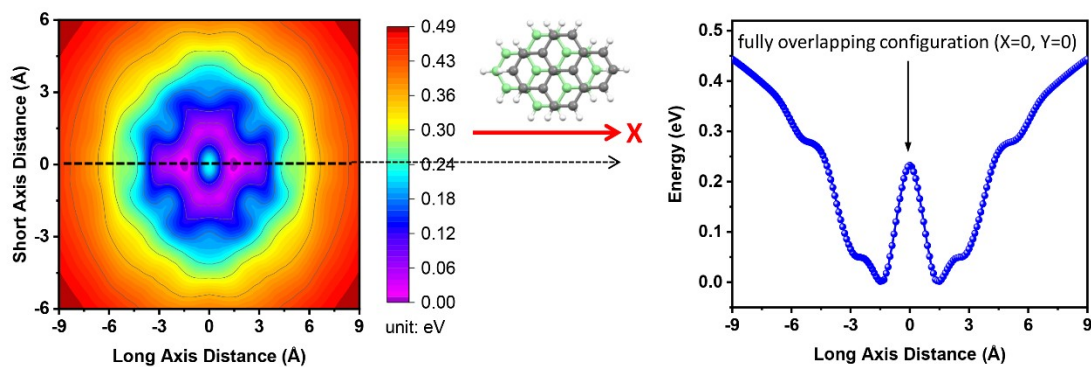

**Figure S9.** Simulation of the PES of the pyrene dimer in its ground state ( $S_0$ ) geometry. The X and Y parameters refer to the translational shift of the center-of-mass of the two pyrene molecules along the long axis and short axis of pyrene molecule, respectively. It is assumed that the pyrene molecular plane is strictly normal to the Z-axis.

For example, we plot a one-dimensional potential energy curve against variable X coordinate when Y=0. Observed from **Figure S9**, a local maximum was found at the fully overlapping configuration, that is, (X=0, Y=0). Moreover, when two pyrene molecules slip along the X direction (long axis of pyrene), they go through multiple maxima/minima points.

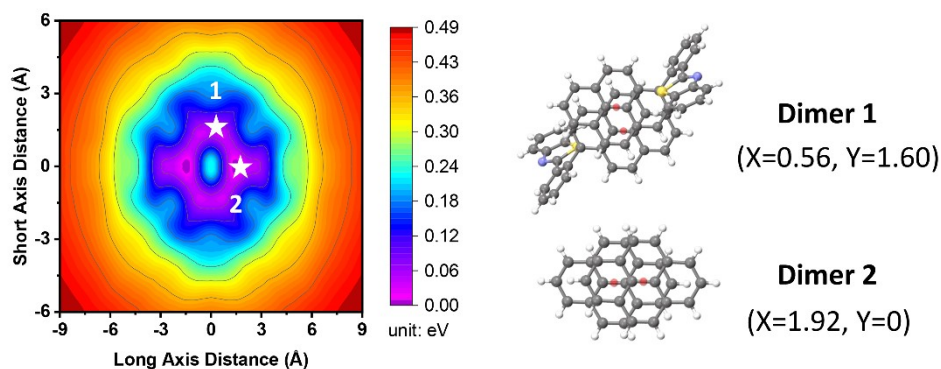

**Figure S10.** Simulation of the PES of the pyrene dimer in its ground state ( $S_0$ ) geometry on the left, and molecular orientation of dimer 1 (pyrene-based dimer for Py-*o*BZT) and dimer 2 (pyrene dimer) on the right. Red ball represents the center-of-mass of each pyrene molecule.

The potential energy actually changed little as a function of  $\pi$ - $\pi$  distance, as verified in our previous paper.<sup>[4]</sup> Therefore in this work, we focus on the potential energy as a function of X and Y variables, that is, potential energy against overlap ratio. After calculation on X and Y slippage, dimer 1 and dimer 2 occupy different potential wells as dictated by the two-dimensional PES.

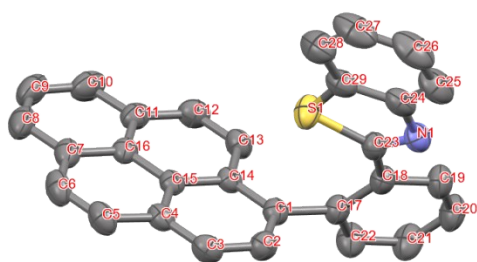

**Figure S11.** Representative ortep diagram of **Py-oBZT**. Thermal ellipsoids are set at 50% probability level. All the hydrogen atoms are omitted for clarity.

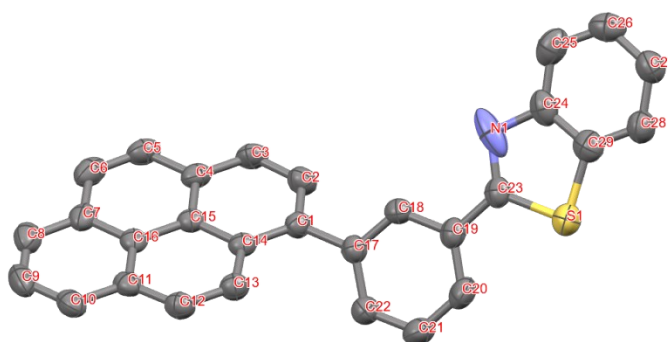

**Figure S12.** Representative ortep diagram of **Py-mBZT**. Thermal ellipsoids are set at 50% probability level. All the hydrogen atoms are omitted for clarity.

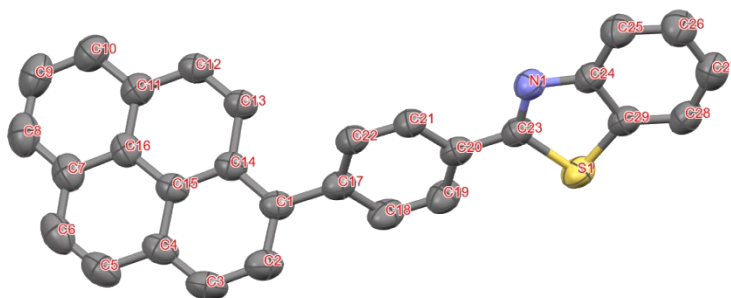

**Figure S13.** Representative ortep diagram of **Py-pBZT**. Thermal ellipsoids are set at 50% probability level. All the hydrogen atoms are omitted for clarity.

**Table S1.** Crystallographic data of **Py-*o*BZT**, **Py-*m*BZT**, and **Py-*p*BZT** compounds.

| <b>compound</b>                    | <b>Py-<i>o</i>BZT</b>              | <b>Py-<i>m</i>BZT</b>              | <b>Py-<i>p</i>BZT</b>                         |
|------------------------------------|------------------------------------|------------------------------------|-----------------------------------------------|
| <b>crystal color</b>               | colorless                          | colorless                          | colorless                                     |
| <b>empirical formula</b>           | C <sub>29</sub> H <sub>17</sub> NS | C <sub>29</sub> H <sub>17</sub> NS | C <sub>29</sub> H <sub>17</sub> NS            |
| <b>formula weight</b>              | 411.49                             | 411.49                             | 411.49                                        |
| <b>T [K]</b>                       | 293.0                              | 293.0                              | 294.0                                         |
| <b>crystal system</b>              | monoclinic                         | orthorhombic                       | orthorhombic                                  |
| <b>space group</b>                 | P2 <sub>1</sub> /c                 | Pbca                               | P2 <sub>1</sub> 2 <sub>1</sub> 2 <sub>1</sub> |
| <b>a [Å]</b>                       | 13.1520(5)                         | 15.7355(6)                         | 7.7310(6)                                     |
| <b>b [Å]</b>                       | 14.0836(5)                         | 8.0029(3)                          | 8.1036(5)                                     |
| <b>c [Å]</b>                       | 12.0152(5)                         | 31.7701(13)                        | 32.103(2)                                     |
| <b>α [°]</b>                       | 90                                 | 90                                 | 90                                            |
| <b>β [°]</b>                       | 115.0090                           | 90                                 | 90                                            |
| <b>γ [°]</b>                       | 90                                 | 90                                 | 90                                            |
| <b>V [Å<sup>3</sup>]</b>           | 2016.88(14)                        | 4000.8(3)                          | 2011.2(2)                                     |
| <b>Z</b>                           | 4                                  | 8                                  | 4                                             |
| <b>F(000)</b>                      | 856.0                              | 1712.0                             | 856.0                                         |
| <b>density [g·cm<sup>-3</sup>]</b> | 1.355                              | 1.366                              | 1.359                                         |
| <b>μ [mm<sup>-1</sup>]</b>         | 0.178                              | 0.179                              | 0.178                                         |
| <b>reflections collected</b>       | 52745                              | 146830                             | 46705                                         |
| <b>unique reflections</b>          | 4619                               | 4072                               | 4282                                          |
| <b>R (int)</b>                     | 0.0399                             | 0.1529                             | 0.0873                                        |
| <b>GOF</b>                         | 1.063                              | 0.891                              | 1.085                                         |
| <b>R<sub>1</sub> [I&gt;2σ(I)]</b>  | 0.0427                             | 0.0904                             | 0.0421                                        |
| <b>ωR<sub>2</sub> [I&gt;2σ(I)]</b> | 0.1018                             | 0.2221                             | 0.0840                                        |
| <b>R<sub>1</sub> (all data)</b>    | 0.0596                             | 0.1263                             | 0.0911                                        |
| <b>ωR<sub>2</sub> (all data)</b>   | 0.1161                             | 0.2562                             | 0,1063                                        |
| <b>CCDC number</b>                 | 2284247                            | 2284246                            | 2284248                                       |

**Table S2.** Bond lengths (Å) for **Py-*o*BZT**.

| <b>Atom</b> | <b>Atom</b> | <b>Length/Å</b> | <b>Atom</b> | <b>Atom</b> | <b>Length/Å</b> |
|-------------|-------------|-----------------|-------------|-------------|-----------------|
| S1          | C23         | 1.7582(16)      | C16         | C11         | 1.417(2)        |
| S1          | C29         | 1.7289(18)      | C16         | C7          | 1.425(2)        |
| N1          | C23         | 1.295(2)        | C13         | C12         | 1.351(2)        |
| N1          | C24         | 1.385(2)        | C29         | C28         | 1.394(3)        |
| C15         | C14         | 1.425(2)        | C11         | C12         | 1.430(2)        |
| C15         | C4          | 1.420(2)        | C11         | C10         | 1.400(2)        |
| C15         | C16         | 1.421(2)        | C2          | C3          | 1.379(2)        |
| C14         | C1          | 1.407(2)        | C7          | C6          | 1.432(3)        |
| C14         | C13         | 1.436(2)        | C7          | C8          | 1.392(3)        |
| C18         | C23         | 1.478(2)        | C5          | C6          | 1.333(3)        |
| C18         | C17         | 1.403(2)        | C19         | C20         | 1.379(2)        |
| C18         | C19         | 1.401(2)        | C20         | C21         | 1.377(3)        |
| C1          | C17         | 1.492(2)        | C22         | C21         | 1.379(2)        |
| C1          | C2          | 1.391(2)        | C28         | C27         | 1.383(3)        |
| C4          | C3          | 1.389(2)        | C10         | C9          | 1.383(3)        |
| C4          | C5          | 1.436(2)        | C8          | C9          | 1.369(3)        |
| C24         | C29         | 1.396(3)        | C25         | C26         | 1.372(3)        |
| C24         | C25         | 1.393(3)        | C27         | C26         | 1.388(4)        |
| C17         | C22         | 1.394(2)        |             |             |                 |

**Table S3.** Bond Angles for **Py-*o*BZT**.

| Atom | Atom | Atom | Angle/°    | Atom | Atom | Atom | Angle/°    |
|------|------|------|------------|------|------|------|------------|
| C29  | S1   | C23  | 89.17(8)   | C11  | C16  | C7   | 119.74(15) |
| C23  | N1   | C24  | 111.24(14) | C12  | C13  | C14  | 121.45(15) |
| C4   | C15  | C14  | 120.00(14) | C24  | C29  | S1   | 109.42(12) |
| C4   | C15  | C16  | 119.86(14) | C28  | C29  | S1   | 129.24(16) |
| C16  | C15  | C14  | 120.15(14) | C28  | C28  | C24  | 121.33(18) |
| C15  | C14  | C13  | 118.03(14) | C16  | C11  | C12  | 118.24(15) |
| C1   | C14  | C15  | 119.02(14) | C10  | C11  | C16  | 118.94(17) |
| C1   | C14  | C13  | 122.94(14) | C10  | C11  | C12  | 122.82(17) |
| C17  | C18  | C23  | 124.34(14) | C3   | C2   | C1   | 121.52(15) |
| C19  | C18  | C23  | 116.77(14) | C16  | C7   | C6   | 118.40(16) |
| C19  | C18  | C17  | 118.89(15) | C8   | C7   | C16  | 118.62(18) |
| C14  | C1   | C17  | 121.38(14) | C8   | C7   | C6   | 122.97(17) |
| C2   | C1   | C14  | 119.61(14) | C2   | C3   | C4   | 120.79(15) |
| C2   | C1   | C17  | 119.01(14) | C6   | C5   | C4   | 121.53(17) |
| N1   | C23  | S1   | 115.01(12) | C20  | C19  | C18  | 121.18(16) |
| N1   | C23  | C18  | 121.45(14) | C13  | C12  | C11  | 121.76(15) |
| C18  | C23  | S1   | 123.47(12) | C21  | C20  | C19  | 119.86(16) |
| C15  | C4   | C5   | 118.55(16) | C5   | C26  | C7   | 121.76(15) |
| C3   | C4   | C15  | 119.03(14) | C21  | C22  | C17  | 121.64(17) |
| C3   | C4   | C5   | 122.42(15) | C20  | C21  | C22  | 119.77(17) |
| N1   | C24  | C29  | 115.14(15) | C27  | C28  | C29  | 117.8(2)   |
| N1   | C24  | C25  | 125.16(18) | C9   | C10  | C11  | 120.5(2)   |
| C25  | C24  | C29  | 119.69(18) | C9   | C8   | C7   | 121.34(18) |
| C18  | C17  | C1   | 122.19(14) | C8   | C9   | C10  | 120.80(18) |
| C22  | C17  | C18  | 118.64(15) | C26  | C25  | C24  | 119.0(2)   |
| C22  | C17  | C1   | 119.12(15) | C28  | C27  | C26  | 121.1(2)   |



---

|     |     |     |            |     |     |     |          |
|-----|-----|-----|------------|-----|-----|-----|----------|
| C15 | C16 | C7  | 119.89(15) | C25 | C26 | C27 | 121.2(2) |
| C11 | C16 | C15 | 120.37(14) |     |     |     |          |

---

**Table S4.** Bond lengths (Å) for **Py-*m*BZT**.

| <b>Atom</b> | <b>Atom</b> | <b>Length/Å</b> | <b>Atom</b> | <b>Atom</b> | <b>Length/Å</b> |
|-------------|-------------|-----------------|-------------|-------------|-----------------|
| S1          | C23         | 1.779(4)        | C7          | C8          | 1.397(6)        |
| S1          | C29         | 1.753(5)        | C19         | C18         | 1.401(6)        |
| N1          | C23         | 1.358(7)        | C19         | C20         | 1.373(6)        |
| N1          | C24         | 1.413(6)        | C17         | C18         | 1.395(6)        |
| C14         | C15         | 1.425(5)        | C17         | C22         | 1.406(6)        |
| C14         | C1          | 1.404(6)        | C13         | C12         | 1.357(6)        |
| C14         | C13         | 1.432(5)        | C28         | C29         | 1.361(6)        |
| C15         | C16         | 1.433(5)        | C28         | C27         | 1.376(7)        |
| C15         | C4          | 1.420(6)        | C3          | C2          | 1.385(6)        |
| C16         | C11         | 1.419(6)        | C6          | C5          | 1.347(7)        |
| C16         | C7          | 1.412(6)        | C24         | C29         | 1.373(7)        |
| C1          | C17         | 1.494(5)        | C24         | C25         | 1.392(7)        |
| C1          | C2          | 1.390(6)        | C22         | C21         | 1.381(6)        |
| C11         | C12         | 1.423(6)        | C10         | C9          | 1.376(7)        |
| C11         | C10         | 1.400(6)        | C27         | C26         | 1.366(7)        |
| C4          | C3          | 1.388(6)        | C21         | C20         | 1.390(7)        |
| C4          | C5          | 1.440(6)        | C9          | C8          | 1.374(7)        |
| C23         | C19         | 1.445(6)        | C26         | C25         | 1.418(8)        |
| C7          | C6          | 1.433(7)        |             |             |                 |

**Table S5.** Bond Angles for **Py-*m*BZT**.

| Atom | Atom | Atom | Angle/°  | Atom | Atom | Atom | Angle/°  |
|------|------|------|----------|------|------|------|----------|
| C29  | S1   | C23  | 87.9(2)  | C20  | C19  | C18  | 119.6(4) |
| C23  | N1   | C24  | 107.2(5) | C18  | C17  | C1   | 120.2(4) |
| C15  | C14  | C13  | 118.1(4) | C18  | C17  | C22  | 118.4(4) |
| C1   | C14  | C15  | 118.2(3) | C22  | C17  | C1   | 121.4(4) |
| C1   | C14  | C13  | 123.6(4) | C17  | C18  | C19  | 121.0(4) |
| C14  | C15  | C16  | 120.0(3) | C12  | C13  | C14  | 121.5(4) |
| C4   | C15  | C14  | 120.0(3) | C13  | C12  | C11  | 121.8(4) |
| C4   | C15  | C16  | 119.3(4) | C29  | C28  | C27  | 119.7(5) |
| C11  | C16  | C15  | 119.9(4) | C2   | C3   | C4   | 120.8(4) |
| C7   | C16  | C15  | 120.1(4) | C3   | C2   | C1   | 121.1(4) |
| C7   | C16  | C11  | 120.0(4) | C5   | C6   | C7   | 121.7(4) |
| C14  | C1   | C17  | 122.4(3) | C29  | C24  | N1   | 117.7(5) |
| C2   | C1   | C14  | 120.3(4) | C29  | C24  | C25  | 119.9(4) |
| C2   | C1   | C17  | 117.3(4) | C25  | C24  | N1   | 122.4(5) |
| C16  | C11  | C12  | 118.6(4) | C6   | C5   | C4   | 120.7(4) |
| C10  | C11  | C16  | 118.4(4) | C21  | C22  | C17  | 120.2(4) |
| C10  | C11  | C12  | 123.0(4) | C9   | C10  | C11  | 121.3(5) |
| C15  | C4   | C5   | 119.3(4) | C28  | C29  | S1   | 127.0(4) |
| C3   | C4   | C15  | 118.7(4) | C28  | C29  | C24  | 122.3(5) |
| C3   | C4   | C5   | 122.0(4) | C24  | C29  | S1   | 110.7(4) |
| N1   | C23  | S1   | 116.5(3) | C26  | C27  | C28  | 120.9(5) |
| N1   | C23  | C19  | 123.4(4) | C22  | C21  | C20  | 120.7(4) |
| C19  | C23  | S1   | 120.0(3) | C19  | C20  | C21  | 120.2(4) |
| C16  | C7   | C6   | 118.9(4) | C8   | C9   | C10  | 120.1(4) |
| C8   | C7   | C16  | 118.8(4) | C27  | C26  | C25  | 120.6(5) |
| C8   | C7   | C6   | 122.3(4) | C9   | C8   | C7   | 121.3(5) |

---

|     |     |     |          |     |     |     |          |
|-----|-----|-----|----------|-----|-----|-----|----------|
| C18 | C19 | C23 | 119.6(4) | C24 | C25 | C26 | 117.5(4) |
| C20 | C19 | C23 | 120.8(4) |     |     |     |          |

---

**Table S6.** Bond lengths (Å) for **Py-*p*BZT**.

| <b>Atom</b> | <b>Atom</b> | <b>Length/Å</b> | <b>Atom</b> | <b>Atom</b> | <b>Length/Å</b> |
|-------------|-------------|-----------------|-------------|-------------|-----------------|
| S1          | C23         | 1.751(3)        | C17         | C18         | 1.402(5)        |
| S1          | C29         | 1.729(4)        | C13         | C12         | 1.353(5)        |
| N1          | C23         | 1.297(5)        | C11         | C12         | 1.424(5)        |
| N1          | C24         | 1.390(5)        | C11         | C10         | 1.397(5)        |
| C21         | C20         | 1.400(5)        | C24         | C25         | 1.388(5)        |
| C21         | C22         | 1.377(5)        | C1          | C2          | 1.395(5)        |
| C20         | C23         | 1.466(5)        | C4          | C3          | 1.388(5)        |
| C20         | C19         | 1.379(5)        | C4          | C5          | 1.431(5)        |
| C15         | C14         | 1.419(5)        | C18         | C19         | 1.380(5)        |
| C15         | C16         | 1.425(5)        | C28         | C27         | 1.369(5)        |
| C15         | C4          | 1.425(5)        | C2          | C3          | 1.378(6)        |
| C22         | C17         | 1.391(5)        | C25         | C26         | 1.375(5)        |
| C14         | C13         | 1.439(5)        | C7          | C6          | 1.425(6)        |
| C14         | C1          | 1.412(5)        | C7          | C8          | 1.396(6)        |
| C16         | C11         | 1.415(5)        | C10         | C9          | 1.385(6)        |
| C16         | C7          | 1.417(5)        | C6          | C5          | 1.338(6)        |
| C29         | C24         | 1.400(5)        | C27         | C26         | 1.388(5)        |
| C29         | C28         | 1.388(5)        | C8          | C9          | 1.383(6)        |
| C17         | C1          | 1.485(5)        |             |             |                 |

**Table S7.** Bond Angles for **Py-pBZT**.

| Atom | Atom | Atom | Angle/°   | Atom | Atom | Atom | Angle/°  |
|------|------|------|-----------|------|------|------|----------|
| C29  | S1   | C23  | 89.32(18) | C10  | C11  | C12  | 121.9(4) |
| C23  | N1   | C24  | 110.3(3)  | N1   | C24  | C29  | 115.6(3) |
| C22  | C21  | C20  | 120.5(3)  | C25  | C24  | N1   | 124.7(3) |
| C21  | C20  | C23  | 119.1(3)  | C25  | C24  | C29  | 119.6(4) |
| C19  | CC20 | C21  | 119.2(3)  | C14  | C1   | C17  | 122.6(3) |
| C19  | C20  | C23  | 119.1(3)  | C2   | C1   | C14  | 119.3(3) |
| C14  | C15  | C16  | 120.5(3)  | C2   | C1   | C17  | 118.1(3) |
| C14  | C15  | C4   | 120.1(3)  | C15  | C4   | C5   | 118.4(4) |
| C4   | C15  | C16  | 119.4(3)  | C3   | C4   | C15  | 118.5(4) |
| N1   | C23  | S1   | 115.7(3)  | C3   | C4   | C5   | 123.1(4) |
| N1   | C23  | C20  | 122.9(3)  | C13  | C12  | C11  | 121.6(4) |
| C20  | C23  | S1   | 121.4(3)  | C19  | C18  | C17  | 120.8(3) |
| C21  | C22  | C17  | 121.5(3)  | C27  | C28  | C29  | 118.5(4) |
| C15  | C14  | C13  | 117.6(3)  | C20  | C19  | C18  | 121.3(4) |
| C1   | C14  | C15  | 119.4(3)  | C3   | C2   | C1   | 121.0(4) |
| C1   | C14  | C13  | 122.9(3)  | C2   | C3   | C4   | 121.7(4) |
| C11  | C16  | C15  | 120.3(3)  | C26  | C25  | C24  | 119.2(4) |
| C11  | C16  | C7   | 119.6(4)  | C16  | C7   | C6   | 118.4(4) |
| C7   | C16  | C15  | 120.3(4)  | C8   | C7   | C16  | 119.0(4) |
| C24  | C29  | S1   | 109.0(3)  | C8   | C7   | C6   | 122.6(4) |
| C28  | C29  | S1   | 130.2(3)  | C9   | C10  | C11  | 120.4(4) |
| C28  | C29  | C24  | 120.8(4)  | C5   | C6   | C7   | 121.7(4) |
| C22  | C17  | C1   | 120.8(3)  | C6   | C5   | C4   | 121.7(4) |
| C22  | C17  | C18  | 117.5(3)  | C28  | C27  | C26  | 121.2(4) |
| C18  | C17  | C1   | 121.6(3)  | C9   | C8   | C7   | 121.0(4) |
| C12  | C13  | C14  | 121.7(3)  | C25  | C26  | C27  | 120.6(4) |

---

|     |     |     |          |    |    |     |          |
|-----|-----|-----|----------|----|----|-----|----------|
| C16 | C11 | C12 | 118.5(3) | C8 | C9 | C10 | 120.5(4) |
| C10 | C11 | C16 | 119.6(4) |    |    |     |          |

---

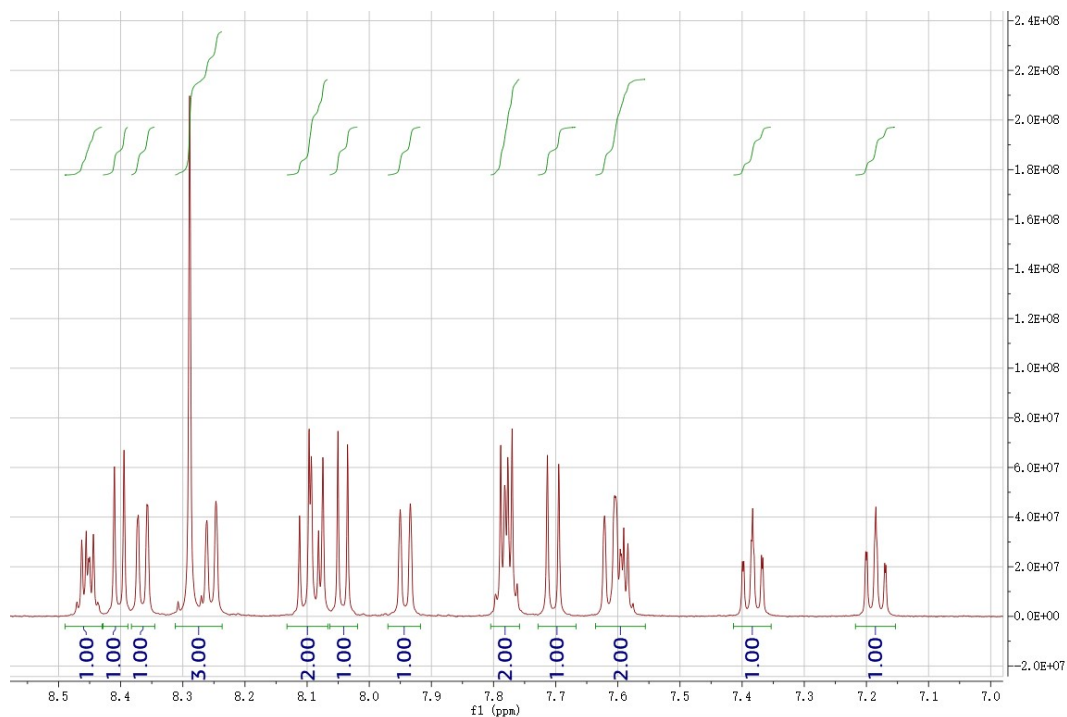

**Figure S14.** <sup>1</sup>H NMR spectrum of Py-*o*BZT compound.

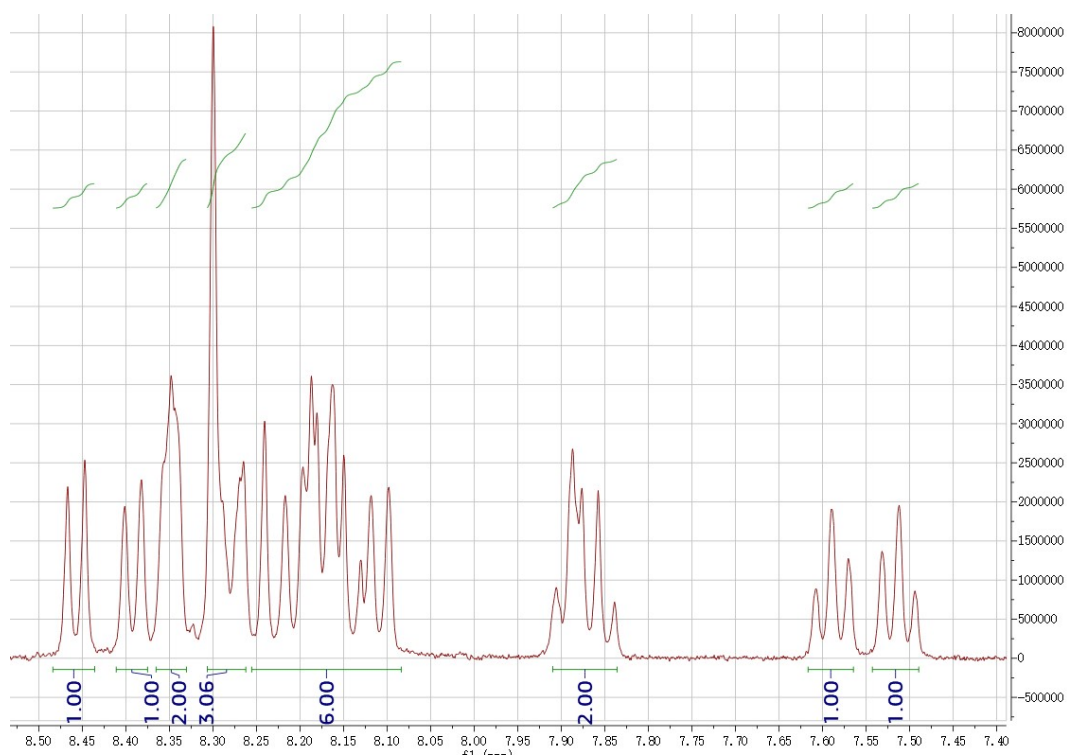

**Figure S15.** <sup>1</sup>H NMR spectrum of Py-*m*BZT compound.



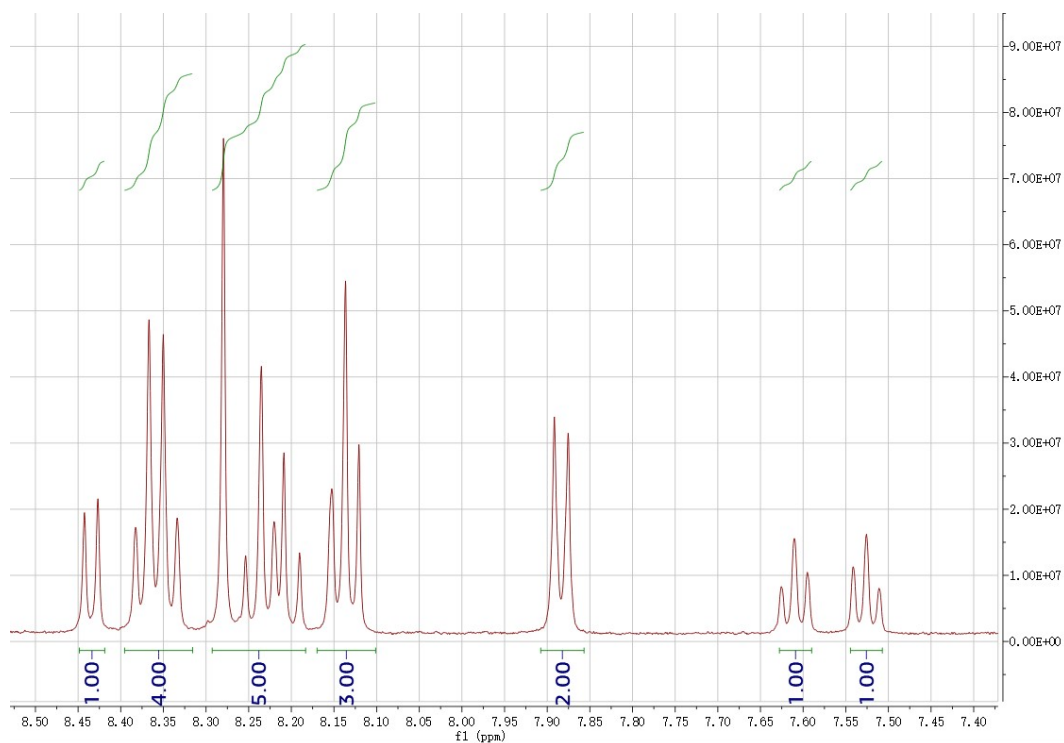

**Figure S16.**  $^1\text{H}$  NMR spectrum of Py-*p*BZT compound.

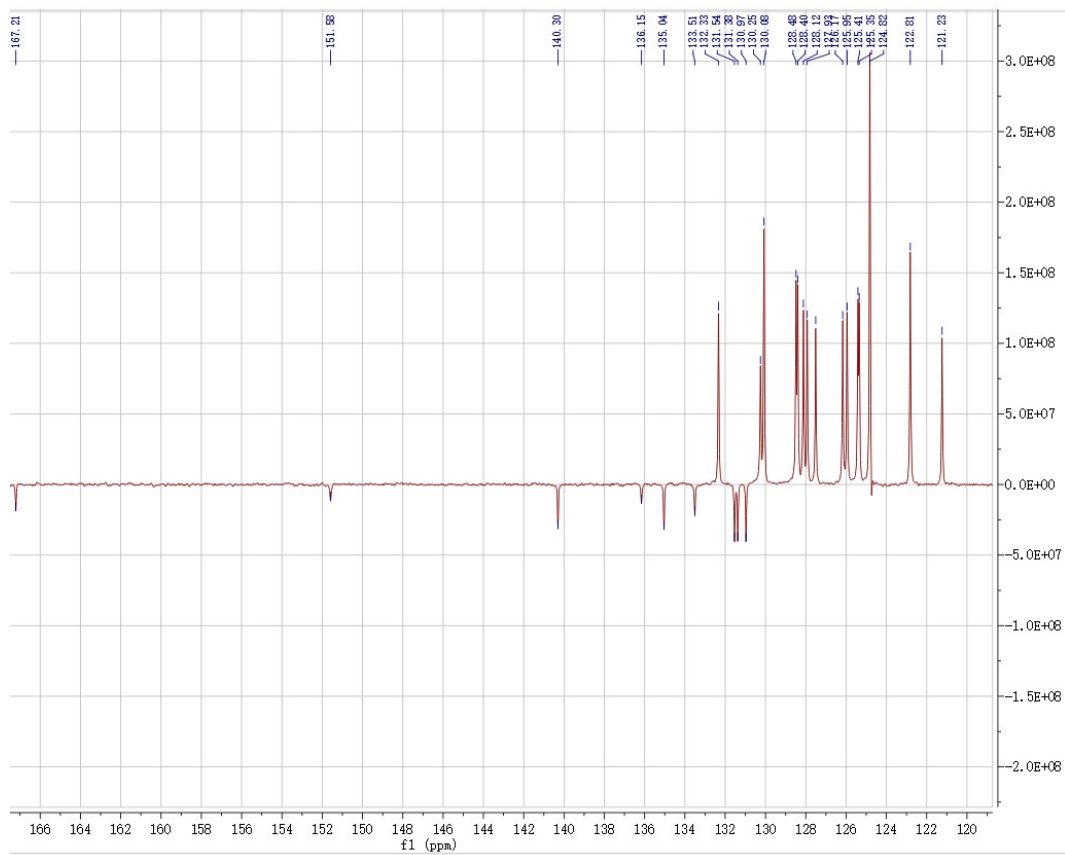

**Figure S17.**  $^{13}\text{C}$  NMR spectrum of Py-*o*BZT compound.

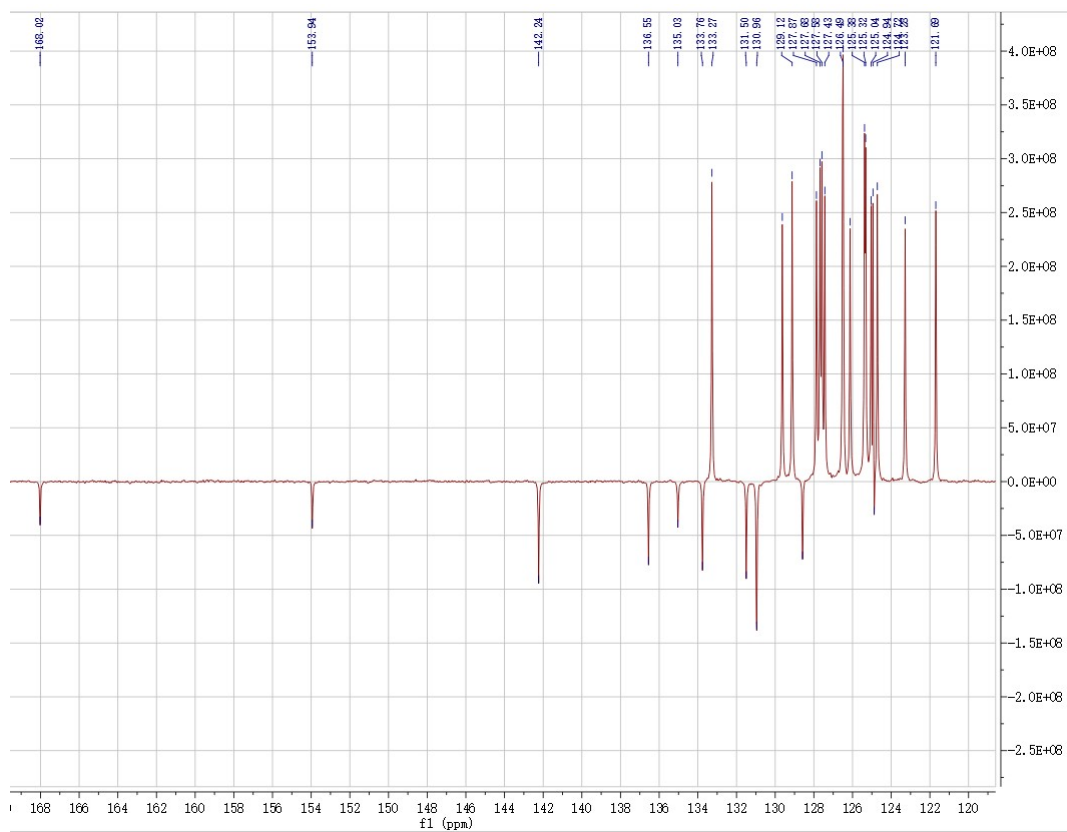

Figure S18.  $^{13}\text{C}$  NMR spectrum of Py-*m*BZT compound.

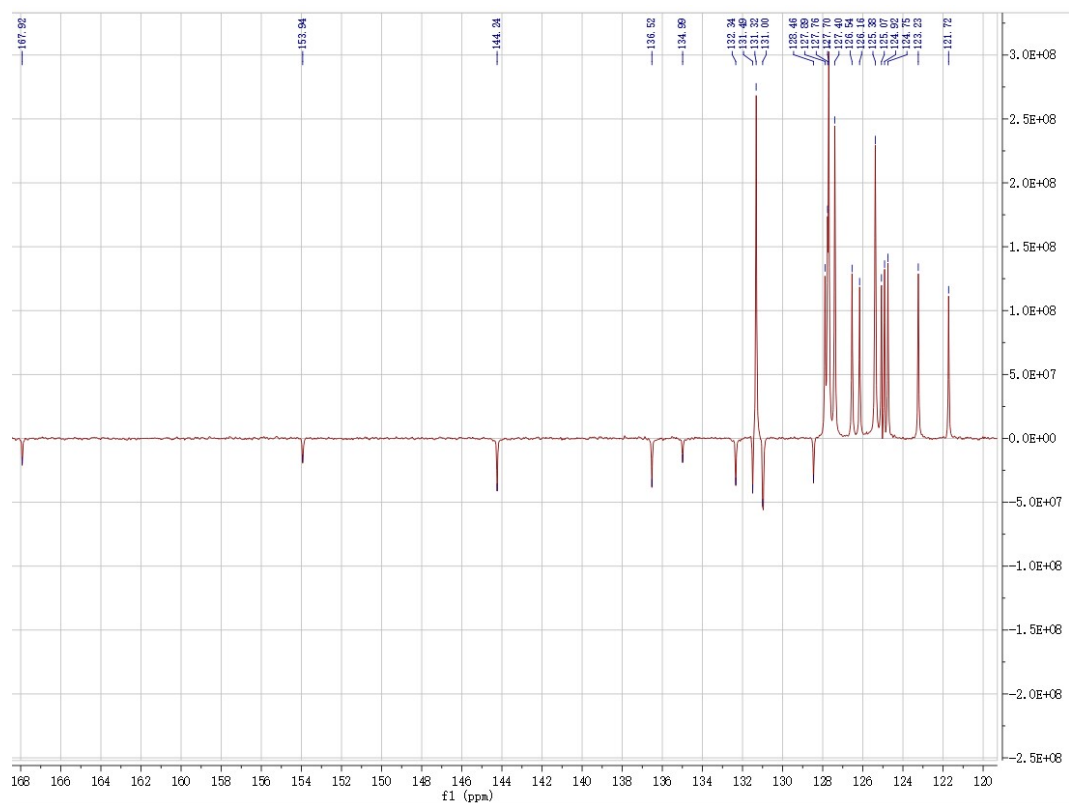

Figure S19.  $^{13}\text{C}$  NMR spectrum of Py-*p*BZT compound.

## SIV References

- [1] M. J. Frisch, G. W. Trucks, H. B. Schlegel, G. E. Scuseria, M. A. Robb, J. R. Cheeseman, G. Scalmani, V. Barone, B. Mennucci, G. A. Petersson, H. Nakatsuji, M. Caricato, X. Li, H. P. Hratchian, A. F. Izmaylov, J. Bloino, G. Zheng, J. L. Sonnenberg, M. Hada, M. Ehara, K. Toyota, R. Fukuda, J. Hasegawa, M. Ishida, T. Nakajima, Y. Honda, O. Kitao, H. Nakai, T. Vreven, J. A. Montgomery, Jr., J. E. Peralta, F. Ogliaro, M. Bearpark, J. J. Heyd, E. Brothers, K. N. Kudin, V. N. Staroverov, T. Keith, R. Kobayashi, J. Normand, K. Raghavachari, A. Rendell, J. C. Burant, S. S. Iyengar, J. Tomasi, M. Cossi, N. Rega, J. M. Millam, M. Klene, J. E. Knox, J. B. Cross, V. Bakken, C. Adamo, J. Jaramillo, R. Gomperts, R. E. Stratmann, O. Yazyev, A. J. Austin, R. Cammi, C. Pomelli, J. W. Ochterski, R. L. Martin, K. Morokuma, V. G. Zakrzewski, G. A. Voth, P. Salvador, J. J. Dannenberg, S. Dapprich, A. D. Daniels, O. Farkas, J. B. Foresman, J. V. Ortiz, J. Cioslowski, and D. J. Fox, *Gaussian 09, Revision D.01*, Gaussian, Inc., Wallingford CT, **2013**.
- [2] T. Lu, F. Chen, Multiwfn: a multifunctional wavefunction analyzer. *J Comput. Chem.* **2012**, *33*, 580–592.
- [3] T. Lu, Molclus program, Version 1.9.9.6, <http://www.keinsci.com/research/molclus.html> (accessed Aug. 28th, 2021).
- [4] X. Zhang, S. Wang, Z. Fu, C. Wang, Z. Yang, Y. Gao, H. Liu, S.-T. Zhang, C. Gu and B. Yang, *Adv. Funct. Mater.* **2023**, *33*, 2301228.
